# Supplementary material for: Structural characterization of a novel acidic polysaccharide from Rosa roxburghii Tratt fruit and its α-glucosidase inhibitory activity
Source: Royal Society of Chemistry journal article supplement (doi:10.1039/c8fo00561c), 2018-01-01

**Table S1.** The standard curve of each monosaccharide standard

| No. | Peak Name | Points | R-Square % | Y=a + b X |        |
|-----|-----------|--------|------------|-----------|--------|
|     |           |        |            | a         | b      |
| 1   | arabinose | 5      | 99.940     | -0.0522   | 0.5649 |
| 2   | galactose | 5      | 99.930     | -0.1039   | 0.7453 |
| 3   | glucose   | 5      | 99.918     | -0.1689   | 0.9591 |
| 4   | xylose    | 5      | 99.942     | 0.0080    | 0.7130 |
| 5   | mannose   | 5      | 99.932     | -0.0693   | 0.3475 |
| 6   | fucose    | 5      | 99.901     | 0.0651    | 0.7125 |

Y represents the peak area and X denotes concentration of the monosaccharide standard (1-10 ppm).

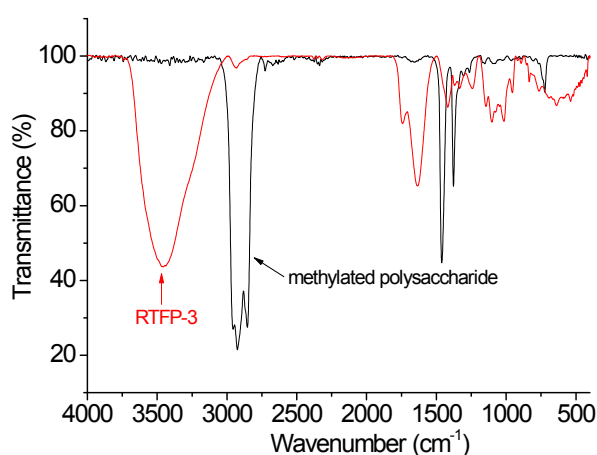

**Fig. S1** IR spectra of completed methylated RTFP-3 and RTFP-3.

Annotation: The IR spectrum of RTFP-3 displayed a broad and intense peak at around 3456 cm<sup>-1</sup> for the characteristic absorption of hydroxyl groups (-OH). After methylation, the peak at around 3456 cm<sup>-1</sup> almost completely disappeared. Besides, the absorption peak at around 2900 cm<sup>-1</sup> was greatly enhanced. These results show that the polysaccharide was completely methylated.

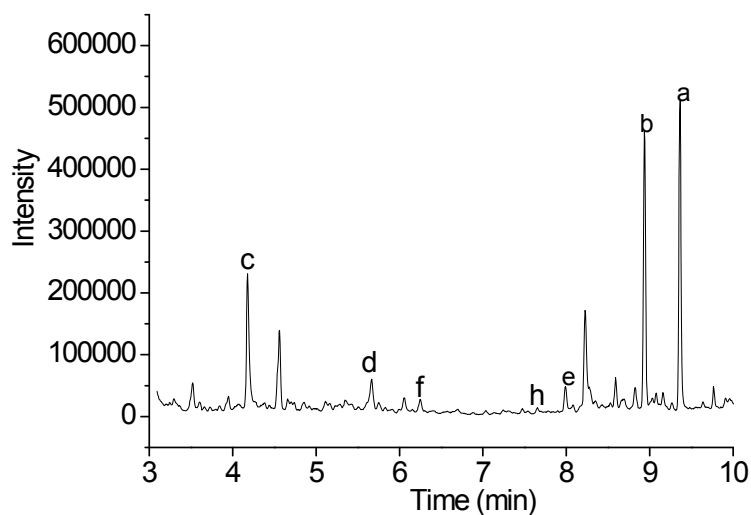

**Fig. S2** GC-MS spectrum of methylated polysaccharide. a, b, c, d, e, f and h represent the partially methylated alditol acetate derived from a glycosidically linked sugar residue.

All the mass spectra of the partially methylated alditol acetate are listed as follows:

a: 1,5,6-Tri-O-acetyl-1-deuterio-2,3,4-tri-O-methyl-D-galactitol

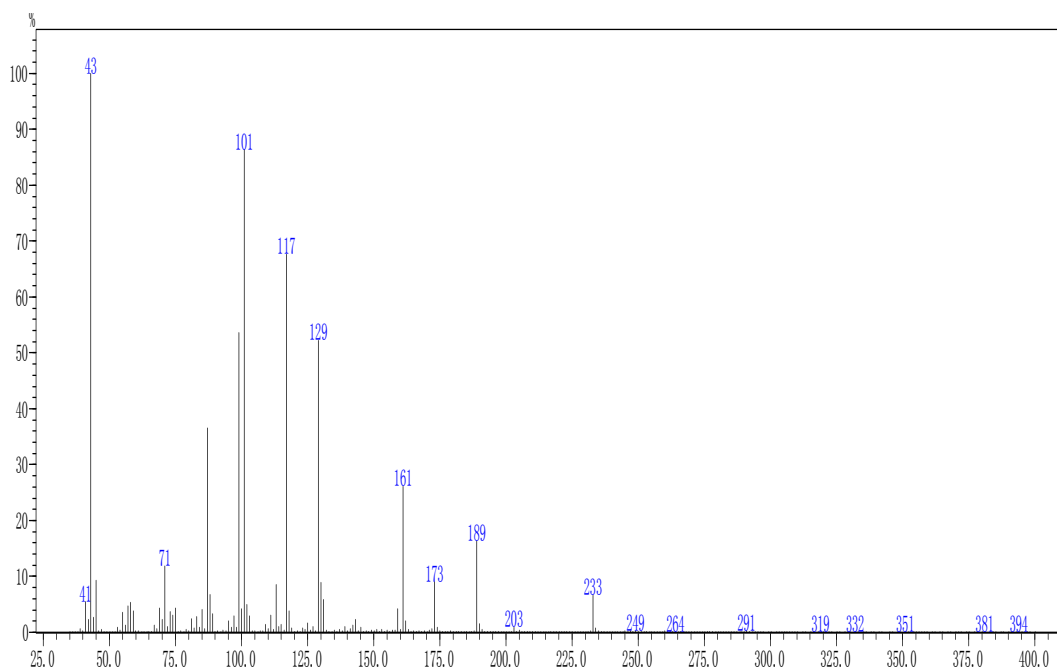

b: 1,4,5-Tri-O-acetyl-1-deuterio-2,3-di-O-methyl-D-arabinitol

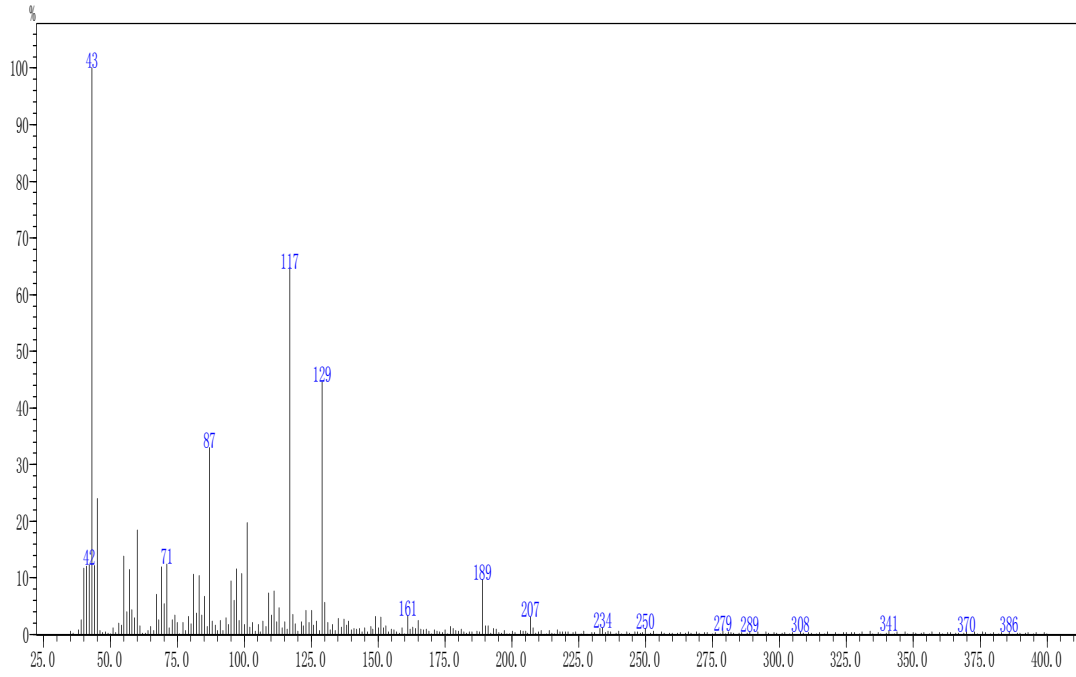

c: 1,3,4,5-Tetra-O-acetyl-1-deuterio-6-deoxy-2-O-methyl-L-galactitol

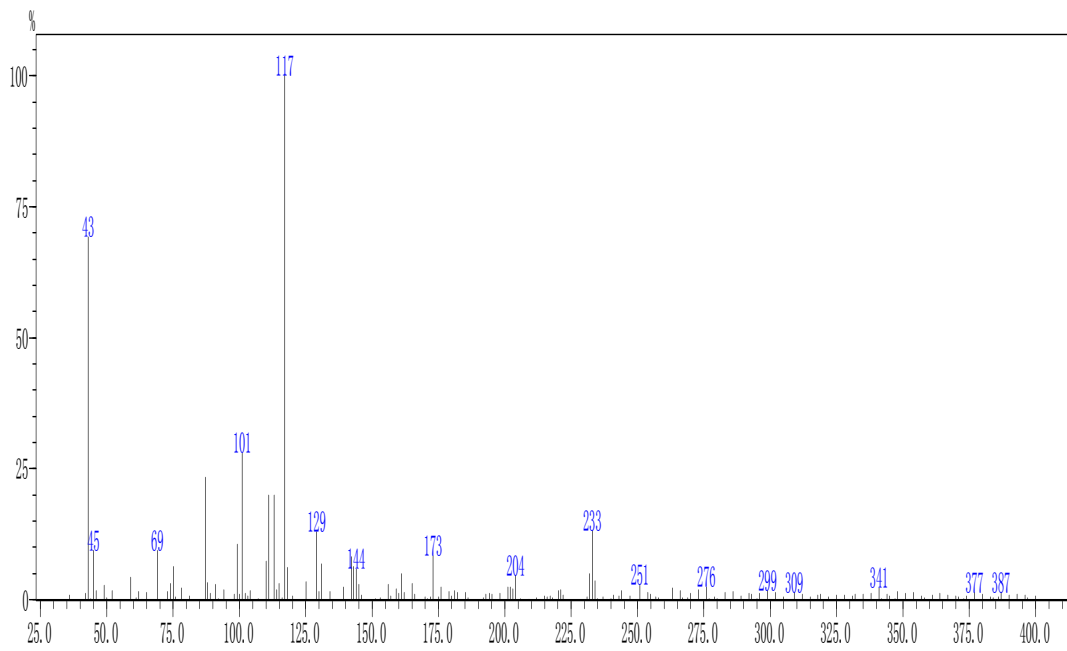

d: 1,5-Di-O-acetyl-1-deuterio-2,3,4,6-tetra-O-methyl-D-glucitol

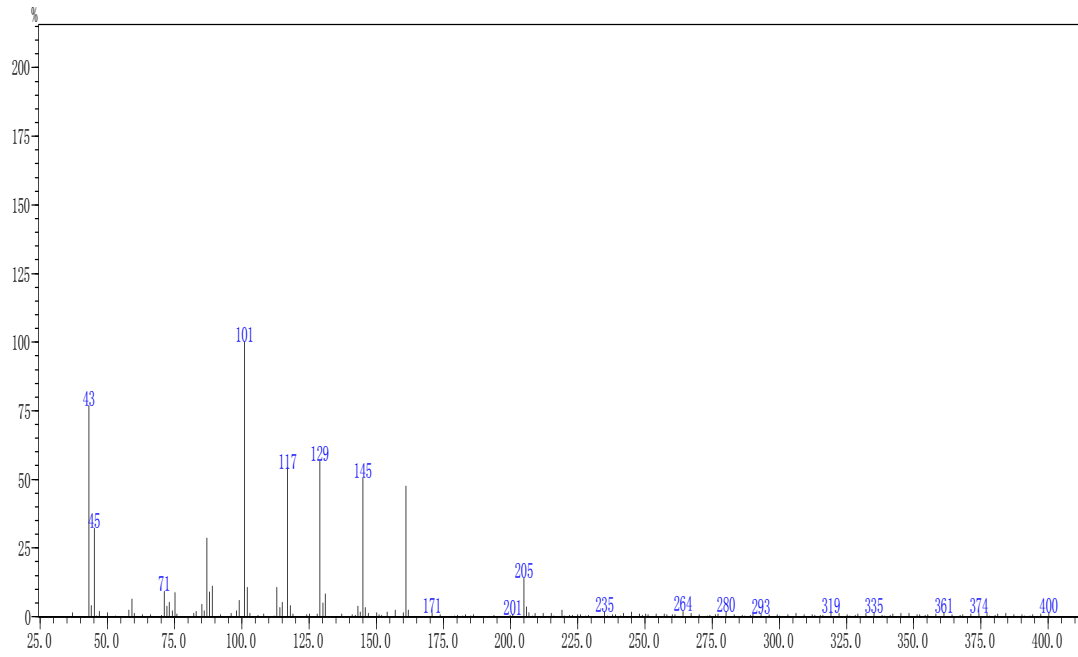

e: 1,4,5-Tri-O-acetyl-1-deuterio-2,3,6-tri-O-methyl-D-glucitol

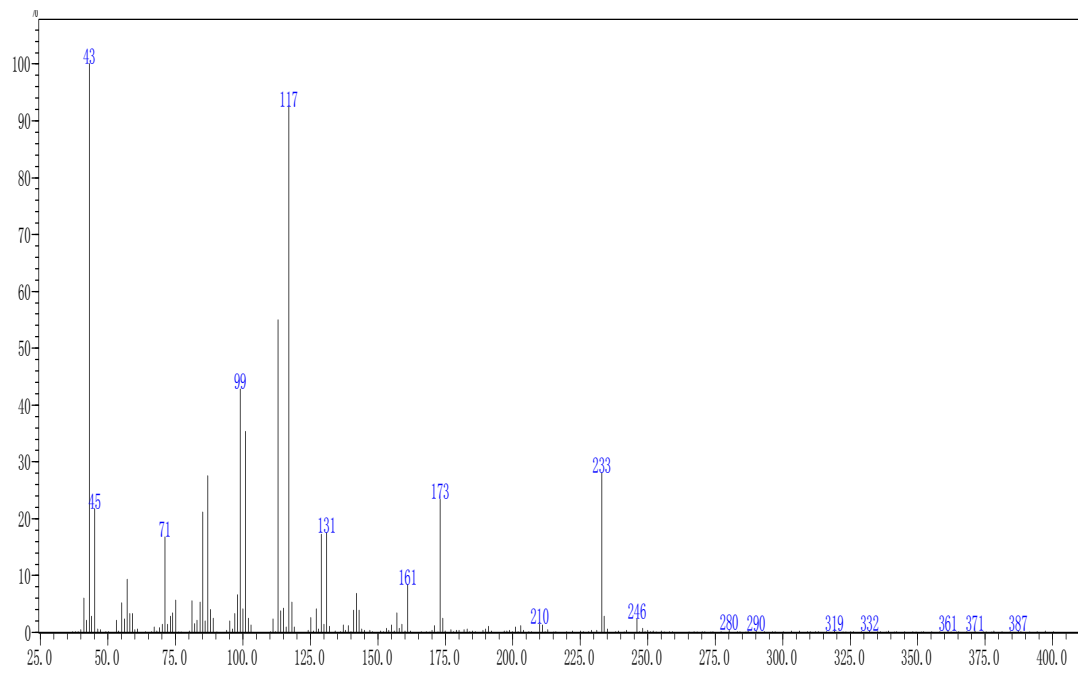

f: 1,3,5,6-Tetra-O-acetyl-2-(acetylmethylamino)-2-deoxy-1-deuterio-4-O-methyl-D-mannitol

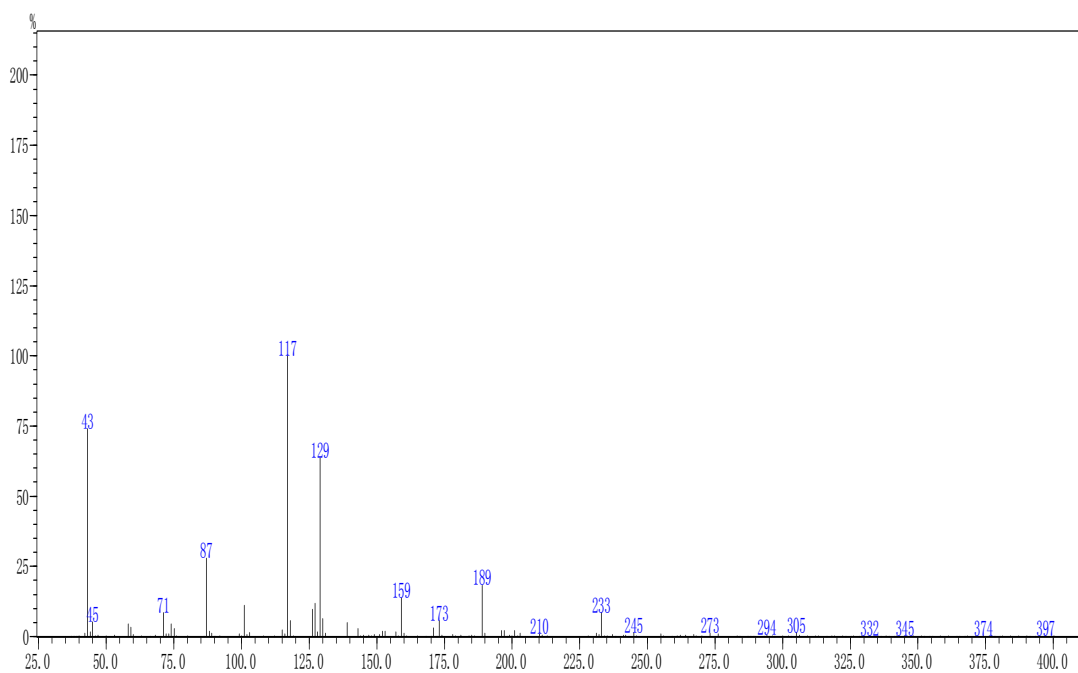

h: 1,5-Di-O-acetyl-1-deuterio-2,3,4-tri-O-methyl-D-xylitol

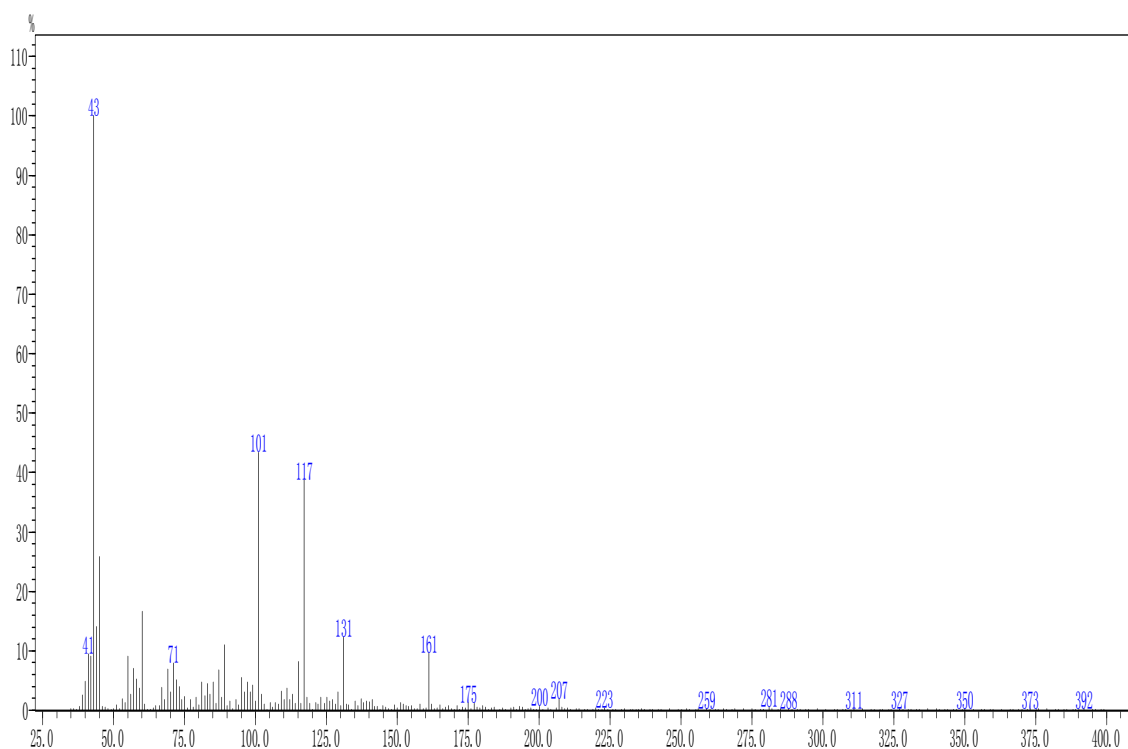

Supplement: c8fo00561c1.pdf [file c8fo00561c1.pdf]
